# Supplementary material for: Synergistic System for Three-Dimensional Evaluation and Triple-Component Formulation of Animal-Derived Ingredients: Practice and Rule Innovation in Traditional Chinese Medicine (TCM) Diet Therapy
Source: Research Square preprint supplement (doi:10.21203/rs.3.rs-7960666/v1), 2025-10-30
Supplement: Supplementary file 1 [file 36bc002bab94e3b4b56b7088.docx]

**Appendix A:** Terminology Comparison Tables for the Synergistic System of Three-Dimensional Evaluation and Triple-Component Formulation of Animal-Derived Ingredients

**Table A1: Theoretical System Terms**

| English Translation | Notes (Corresponds to Main Manuscript Sections) |
| --- | --- |
| Three-Dimensional Evaluation System | Core system for quantifying Yin-Yang properties via "environmental habits-metabolic traits-growth cycles"; corresponds to Section 2.2 |
| Triple-Component Formulation | Includes "Celestial-Terrestrial-Aquatic" functional axis and "Yang-Neutral-Yin" property axis; Terrestrial Category accounts for 40%-60%, proportion difference between Celestial/Aquatic ≤20%; corresponds to Section 3.2.2 |
| Yin-Yang Property | Defined by "direction" (Yang/Yin/Neutral) and "intensity" (1-10 points); criteria: >+3 points (Yang), <-3 points (Yin), -3~+3 points (Neutral); corresponds to Section 2.1.2 |
| Correspondence between Human and Nature | TCM theoretical basis (from *Huangdi Neijing*); ingredient properties are influenced by environment (e.g., plateau yellow cattle: Yang-tendency, deep-sea tuna: Yin-tendency); corresponds to Section 1.2 |
| Yang Transforms into Qi, Yin Condenses into Substance | Core *Huangdi Neijing* theory; Yang-tendency ingredients for energy conversion (e.g., fast-growing broiler), Yin-tendency for substance accumulation (e.g., Guangxi grass turtle); corresponds to Section 1.2 |
| Pivotal Axis-Wheel Theory | From Peng Ziyi’s *Ancient Chinese Medicine of Circular Motion*; "Pivotal Axis" = Middle Jiao (Terrestrial Category), "Wheels" = Liver ascending/Lung descending (Celestial/Aquatic); corresponds to Section 1.2 |
| Life Vitality Curve | Describes growth cycle dynamics (sexual maturity time, monthly weight gain rate); core reference for "Growth Cycle Indicator"; corresponds to Section 2.2.3 |
| Tonic Logic | TCM diet therapy mechanism (e.g., "mild tonification" for Qi-Deficiency, "Yang-warming tonification" for Yang-Deficiency); balances "efficacy-risk"; corresponds to Section 3.3.2 |

**Table A2: 3D Evaluation Index Terms**

| English Translation | Notes (Corresponds to Main Manuscript Sections) |
| --- | --- |
| Environmental Habit Indicator | Core for Yin-Yang direction: Yang (arid land/diurnal), Yin (water area/nocturnal), Neutral (aquatic-terrestrial transition); base score = 4 points; corresponds to Section 2.2.1 |
| Metabolic Trait Indicator | Rules for homeotherms/poikilotherms: homeotherms (direction by body temp ≥37.5℃=Yang), poikilotherms (direction by habitat temp ≥25℃=Yang); corresponds to Section 2.2.2 |
| Growth Cycle Indicator | Direction by sexual maturity: <1 year (Yang), 1-3 years (Neutral), >3 years (Yin); includes intensity adjusters (monthly weight gain, generation cycle); corresponds to Section 2.2.3 |
| Directional Coefficient | Quantifies tendency: Yang (+1), Neutral (0), Yin (-1); used for "Directional Intensity Value" calculation; corresponds to Section 2.2.1 |
| Intensity Score | 1-10 points (Yang/Yin), 3-7 points (Neutral); calculated as base score + bonus (e.g., Yang: annual sunshine ≥2500h +2 points) - penalty; corresponds to Section 2.2.1 |
| Concordant Weighting | Weight ratio when environmental/metabolic directions match: 40% (environmental) + 40% (metabolic) + 20% (growth); corresponds to Section 2.3.1 |
| Antagonistic Weighting | Weight ratio when directions conflict: 30% (environmental) + 50% (metabolic) + 20% (growth); prioritizes metabolism; corresponds to Section 2.3.1 |
| Latent Bias | Tendency of low-harmony Neutral ingredients (3-4 points); fine-tuned (+0.5 for Yang-leaning, -0.5 for Yin-leaning); corresponds to Section 2.3.2 |
| Directional Intensity Value | Core for formulation calculation: (Intensity Score × Directional Coefficient) + special adjustment (e.g., Latent Bias fine-tuning); corresponds to Section 2.3.2 |

**Table A3: Triple-Component Formulation Rules Terms**

| English Translation | Notes (Corresponds to Main Manuscript Sections) |
| --- | --- |
| Celestial Category (Ascending-Dispersing) | Dominated by birds; promotes upward essence dispersion (e.g., Qingyuan chicken); drives "Liver Wood ascending"; diurnal activity ≥70%; corresponds to Section 3.2.1 |
| Terrestrial Category (Neutralizing) | Dominated by beasts; mediates Middle Jiao (e.g., mutton); connects ascending/descending; accounts for 40%-60%; absence causes Qi stagnation; corresponds to Section 3.2.1 |
| Aquatic Category (Descending-Collecting) | Dominated by aquatic/creeping animals; promotes essence storage (e.g., soft-shelled turtle); drives "Lung Metal descending"; nocturnal activity ≥70%; corresponds to Section 3.2.1 |
| Essence-Transport Mechanism | Core efficacy of formulation: "Celestial ascending-Terrestrial transforming-Aquatic collecting"; corresponds to Section 3.1 |
| Dual-Axis Synergy | Functional axis (structure: Celestial/Terrestrial/Aquatic) + Property axis (bias adjustment: Yang/Neutral/Yin); e.g., "Terrestrial Yang + Celestial Yin-leaning" for Yang-Deficiency; corresponds to Section 3.1 |
| Property Modulation | Adapt to constitution via ingredient ratio: Yang-Deficiency (Yang-dominated, e.g., mutton 50%), Yin-Deficiency (Yin-dominated, e.g., soft-shelled turtle 40%); corresponds to Section 3.3.2 |
| Antagonism Contraindication | Forbid >50% proportion difference between Yang/Yin; avoid cold-heat conflict (e.g., abdominal pain); corresponds to Section 3.4.2 |
| Part-Specific Adjustment | Fine-tune properties by part: fat (+1 point for Yang/Yin), bones (+1 for Yin), viscera (+1 for Yang); max intensity ≤10 points; corresponds to Section 2.4.1 |
| Total Formulation Score | Defines formulation property: Σ (Directional Intensity Value × Ingredient Proportion); e.g., Yang-Deficiency formulation: +3.5 points; corresponds to Section 3.5.1 |
| Ascending-Harmonizing-Descending Cycle | Core Qi movement of formulation; ensures "ascending without dissipation, collecting without stagnation"; corresponds to Section 3.2.2 |

**Table A4: Validation & Mechanism Terms**

| English Translation | Notes (Corresponds to Main Manuscript Sections) |
| --- | --- |
| Counterexample Validation | Verifies 3D evaluation accuracy: compares ancient records (e.g., *Bencao Beiyao* "pork is sweet-mild") with 3D results; corresponds to Section 4 |
| Constitution-Specific Formulation Cases | Formulations for Yang-Deficiency (mutton-duck feet-crucian carp), Yin-Deficiency (pork-hen-turtle), Qi-Deficiency (beef-pigeon-dried oyster); corresponds to Section 4 |
| Compositional Mechanism Support | Modern components validate properties: Yang (30%-40% saturated fatty acids), Yin (25%-30% Omega-3), Celestial (1.2-1.8g/100g creatine); corresponds to Section 2 (Discussion) |
| Species Proximity | Protein sequence similarity (81.7%) between humans and food animals (*Food Chemistry*, 2021); explains higher efficacy of animal-derived ingredients; corresponds to Section 3 (Discussion) |
| Excessive Property Bias | Risk of >70% Yang/Yin proportion; requires ≥30% Neutral/opposite ingredients (e.g., Yang-tendency + Neutral crucian carp); corresponds to Section 3.3.2 |

**Table A5: Other Key Terms**

| English Translation | Notes (Corresponds to Main Manuscript Sections) |
| --- | --- |
| Preventive Treatment | TCM core concept; focuses on subhealth regulation (e.g., cold intolerance, dry mouth); no disease diagnosis/treatment; corresponds to Section 1 (Introduction) |
| Legally Farmed Animal-Sourced Ingredients | Ethical prerequisite; complies with *Wildlife Protection Law (2018 Revision)*; no wild animals; corresponds to Section 1.1 |
| Artificially Hyperactive Ingredients | Intensity adjustment: e.g., fast-growing chicken (-1 point); common in caged/fattened animals; corresponds to Section 2.4.3 |
| Latent Bias Fine-Tuning | Adjustment for low-harmony Neutral ingredients; e.g., Shandong free-range duck (Neutral-Yin-leaning: -0.5 points); corresponds to Section 2.3.2 |
| Artificial Fattening Feed Adjustment | Breeding adjustment: +1 point for Yang-tendency, -1 point for Yin-tendency; corresponds to Section 2.4.3 |
