# Supplementary material for: Synergistic System for Three-Dimensional Evaluation and Triple-Component Formulation of Animal-Derived Ingredients: Practice and Rule Innovation in Traditional Chinese Medicine (TCM) Diet Therapy
Source: Research Square preprint supplement (doi:10.21203/rs.3.rs-7960666/v1), 2025-10-30
Supplement: Supplementary file 2 [file 3c8adcf415b30794217a6767.docx]

**Supplementary Methods: Detailed Scoring Standards for the Three-Dimensional Evaluation System**

**Corresponding Manuscript**

Synergistic System for Three-Dimensional Evaluation and Triple-Component Formulation of Animal-Derived Ingredients Practice and Rule Innovation in Traditional Chinese Medicine (TCM) Diet Therapy

**Corresponding Sections in Main Manuscript**

Sections 2.2 (12-58 to 12-78)

**1. Environmental Habit Indicator**

| Evaluation Subitem | Scoring Rules | Example (Qingyuan Free-Range Chicken) |
| --- | --- | --- |
| Direction Determination | - Yang: Arid land (annual precipitation < 800 mm) or saline-alkaline beaches (pH > 8.5)  - Neutral: Aquatic-terrestrial transition zones (annual flooding < 180 days)  - Yin: Water areas (depth ≥ 0.5 m) or high-humidity areas (annual flooding ≥ 180 days) | Habitat: Hilly arid area (annual precipitation = 750 mm) → Yang direction (Directional Coefficient = +1) |
| Base Score | Uniform base score = 4 points; Directional Coefficient: Yang (+1), Neutral (0), Yin (-1) | Base score (4) + Directional Coefficient (+1) → Initial score = 5 points |
| Intensity Adjustment | - Yang: Diurnal activity ratio ≥ 70% (no deduction); < 50% (deduct 2 points); < 30% (deduct an additional 1 point)  - Neutral: Day-night activity ratio 30%–70% (deduct 1 point for deviation)  - Yin: Nocturnal activity ratio ≥ 70% (deduction rules same as Yang) | Diurnal activity ratio = 80% → No deduction |
| Supplementary Bonus | - Yang: Max +6 points (e.g., annual sunshine ≥ 2500 h [+2], vegetation coverage < 30% [+1], altitude ≥ 1000 m [+1])  - Neutral: Max +3 points (e.g., annual sunshine 1500–2500 h, vegetation coverage 30%–70%)  - Yin: Max +6 points (e.g., annual sunshine < 1500 h, humidity > 60%, water depth ≥ 10 m) | Annual sunshine = 2600 h [+2] + vegetation coverage = 25% [+1] → Total bonus = +3 points |
| Final Dimension Score | Initial score + Intensity adjustment + Supplementary bonus = 5 + 0 + 3 = 8 points | - |

**2. Metabolic Trait Indicator**

| Animal Type | Direction Determination Standards | Intensity Adjustment Rules | Example (Qingyuan Free-Range Chicken, Homeotherm) |
| --- | --- | --- | --- |
| Homeotherms | - Yang: Normal body temperature ≥ 37.5°C  - Neutral: Normal body temperature 36.5–37.4°C  - Yin: Normal body temperature ≤ 36.5°C | - Yang: Daily activity ≥ 8 h (no deduction); ≤ 3 h (deduct 2 points)  - Neutral: Daily activity 4–7 h (deduct 1 point for deviation)  - Yin: Daily activity ≤ 3 h (deduct 2 points if ≥ 8 h) | Body temperature = 41°C (Yang) + Daily activity = 10 h (no deduction) → Directional Coefficient = +1, Intensity adjustment = 0 |
| Poikilotherms | - Yang: Average daily temperature of main activity environment ≥ 25°C  - Neutral: 15–24°C  - Yin: ≤ 14°C | Same as homeotherms; additional +1 point for Yin if hibernation/aestivation ≥ 3 months | - |
| Supplementary Bonus | - Yang: Max +6 points (e.g., daily food intake ≥ 5% of body weight [+2], fecal moisture < 40% [+1], cold resistance [+1])  - Neutral: Max +3 points (e.g., balanced temperature resistance)  - Yin: Max +6 points (e.g., food intake ≤ 2% of body weight [+2], heat resistance [+1]) | Carnivorous trait [+1] → Total bonus = +1 point |  |
| Final Dimension Score | Base score (4) + Directional Coefficient (+1) + Intensity adjustment (0) + Supplementary bonus (+1) = 6 points |  |  |

**3. Growth Cycle Indicator**

| Evaluation Subitem | Scoring Rules | Example (Qingyuan Free-Range Chicken) |
| --- | --- | --- |
| Direction Determination | - Yang: Sexual maturity < 1 year  - Neutral: Sexual maturity 1–3 years  - Yin: Sexual maturity > 3 years | Sexual maturity = 6 months (< 1 year) → Yang direction (Directional Coefficient = +1) |
| Base Score | Uniform base score = 4 points; Directional Coefficient: Yang (+1), Neutral (0), Yin (-1) | Base score (4) + Directional Coefficient (+1) → Initial score = 5 points |
| Intensity Adjustment | - Yang: Monthly weight gain rate ≥ 9% (no deduction); ≤ 4% (deduct 2 points); additional 2 points deduction if weight gain stops for ≥ 1 month after sexual maturity  - Neutral: Monthly weight gain rate 4%–14% (deduct 1 point if fluctuation > 5%)  - Yin: Monthly weight gain rate ≤ 3% (deduct 2 points if ≥ 12%) | Monthly weight gain rate = 20% (≥ 9%) → No deduction |
| Supplementary Bonus | - Yang: Max +6 points (e.g., artificial breeding [+1], generation cycle < 2 years [+1], daily weight gain ≥ 50 g [+1])  - Neutral: Max +3 points (e.g., semi-wild environment)  - Yin: Max +6 points (e.g., wild environment [+1], generation cycle > 4 years [+1]) | Artificial breeding [+1] + generation cycle = 1.5 years [+1] + daily weight gain = 60 g [+1] → Total bonus = +3 points |
| Final Dimension Score | Initial score + Intensity adjustment + Supplementary bonus = 5 + 0 + 3 = 8 points | - |

**4. Three-Dimensional Integration Calculation Formula**

***4.1 Weighting Rules***

*4.1.1 Concordant Direction*

Environmental and metabolic directions are consistent (e.g., Yang + Yang, Yin + Yin).

Weight ratio: Environmental Habit (40%) + Metabolic Trait (40%) + Growth Cycle (20%)

*4.1.2 Antagonistic Direction*

Environmental and metabolic directions are opposite (e.g., Yang + Yin).

Weight ratio: Environmental Habit (30%) + Metabolic Trait (50%) + Growth Cycle (20%)

***4.2 Total Score Calculation***

*4.2.1 Concordant Direction Example (Qingyuan Free-Range Chicken)*

Total Score = (Environmental Score × 40%) + (Metabolic Score × 40%) + (Growth Score × 20%) = (8 × 0.4) + (6 × 0.4) + (8 × 0.2) = 3.2 + 2.4 + 1.6 = 7.2 points (Yang-tendency)

*4.2.2 Antagonistic Direction Example (Deep-Sea Tuna)*

(Environmental Score: Yin = -8; Metabolic Score: Yin = -7; Growth Score: Yin = -6)

Total Score = (-8 × 0.3) + (-7 × 0.5) + (-6 × 0.2) = -2.4 - 3.5 - 1.2 = -7.2 points (Yin-tendency)

**4.3 Bias Determination Criteria**

- > +3 points: Yang-tendency (warm/hot)

- < -3 points: Yin-tendency (cool/cold)

- -3 ~ +3 points: Neutral-tendency (mild)

**Notes**

1. All scoring rules correspond to the theoretical framework and data logic in the main manuscript (12-58 to 12-78).
2. For further verification of individual ingredient scores, refer to the "Results" section of the main manuscript.
